# Supplementary material
Source: Springer Nature journal article supplement (https://www.springermedizin.de/resource/supplementary/12882_2013_924_MOESM8_ESM.pdf/9454040)

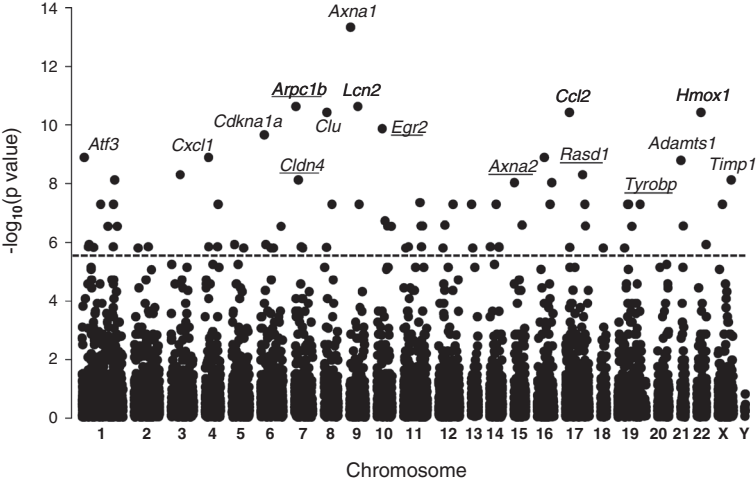

Supplement: MOESM8 [file 9454040]
